# Supplementary material
Source: publisher site journal article supplement (https://www.dovepress.com/article/144725)
Supplement: Supplementary file 1 [file get_supplementary_file.php]

**Table S1: List of identified differentially methylated genes (DMGs) in Prostate cancer**

| S.No. | Name of the Gene                                                  |
|-------|-------------------------------------------------------------------|
| 1     | A-Kinase Anchoring Protein 2 ( <i>AKAP2</i> )                     |
| 2     | Alpha-1,6-Mannosyltransferase ( <i>ALG12</i> )                    |
| 3     | Aristaless-Like Homeobox 3 ( <i>ALX3</i> )                        |
| 4     | Annexin A2 ( <i>ANXA2</i> )                                       |
| 5     | Aldehyde Oxidase 1 ( <i>AOX1</i> )                                |
| 6     | Adenomatosis Polyposis Coli ( <i>APC</i> )                        |
| 7     | Androgen receptor ( <i>AR</i> )                                   |
| 8     | BarH Like Homeobox 1 ( <i>BARHL1</i> )                            |
| 9     | BarH Like Homeobox 2 ( <i>BARHL2</i> )                            |
| 10    | Brain-derived neurotrophic factor ( <i>BDNF</i> )                 |
| 11    | Bone Morphogenetic Protein 4 ( <i>BMP4</i> )                      |
| 12    | Calcium Voltage-Gated Channel Subunit Alpha1 D ( <i>CACNA1D</i> ) |
| 13    | Calcium Voltage-Gated Channel Subunit Alpha1 G ( <i>CACNA1G</i> ) |
| 14    | Caveolin 1 ( <i>CAVI</i> )                                        |
| 15    | Coiled-Coil Domain Containing 181 ( <i>CCDC181</i> )              |
| 16    | Coiled-Coil Domain Containing 8 ( <i>CCDC8</i> )                  |
| 17    | Cyclin D2 ( <i>CCND2</i> )                                        |
| 18    | Cluster of differentiation 40 ( <i>CD40</i> )                     |
| 19    | Cluster of differentiation 44 ( <i>CD44</i> )                     |
| 20    | Cluster of Differentiation 8a ( <i>CD8a</i> )                     |
| 21    | Cadherin-1 ( <i>CDH1</i> )                                        |
| 22    | Cadherin-13 ( <i>CDH13</i> )                                      |
| 23    | Cyclin Dependent Kinase Inhibitor 1B ( <i>CDKN1B</i> )            |
| 24    | Cyclin Dependent Kinase Inhibitor 1C ( <i>CDKN1C</i> )            |
| 25    | Cyclin Dependent Kinase Inhibitor 2A ( <i>CDKN2A</i> )            |
| 26    | Caudal Type Homeobox 2 ( <i>CDX2</i> )                            |

|    |                                                                              |
|----|------------------------------------------------------------------------------|
| 27 | Caudal Type Homeobox 4 ( <i>CDX4</i> )                                       |
| 28 | CAP-Gly Domain Containing Linker Protein Family Member 4 ( <i>CLIP4</i> )    |
| 29 | Cannabinoid Receptor 1 ( <i>CNR1</i> )                                       |
| 30 | Cochlin ( <i>COCH</i> )                                                      |
| 31 | Collagen Type IV Alpha 2 Chain ( <i>COL4A2</i> )                             |
| 32 | Collagen Type IX Alpha 2 Chain ( <i>COL9A2</i> )                             |
| 33 | Corticotropin Releasing Hormone Binding Protein ( <i>CRHBP</i> )             |
| 34 | C-Terminal Binding Protein 2 ( <i>CTBP2</i> )                                |
| 35 | Cytochrome P450 Family 27 Subfamily A Member 1 ( <i>CYP27A1</i> )            |
| 36 | Disabled-1 ( <i>DABI</i> )                                                   |
| 37 | Death-associated protein kinase 1 ( <i>DAPK1</i> )                           |
| 38 | Duffy antigen/chemokine receptor ( <i>DARC</i> )                             |
| 39 | Dickkopf WNT Signaling Pathway Inhibitor 3 ( <i>DKK3</i> )                   |
| 40 | Distal-Less Homeobox 1 ( <i>DLX1</i> )                                       |
| 41 | Distal-Less Homeobox 4 ( <i>DLX4</i> )                                       |
| 42 | Dedicator Of Cytokinesis 1 ( <i>DOCK1</i> )                                  |
| 43 | Endothelin Receptor Type A ( <i>EDNRA</i> )                                  |
| 44 | Endothelin Receptor Type B ( <i>EDNRB</i> )                                  |
| 45 | EGF Containing Fibulin Like Extracellular Matrix Protein 1 ( <i>EFEMP1</i> ) |
| 46 | Embryonal Fyn-Associated Substrate ( <i>EFS</i> )                            |
| 47 | E74 Like ETS Transcription Factor 4 ( <i>ELF4</i> )                          |
| 48 | Engrailed Homeobox 2 ( <i>EN2</i> )                                          |
| 49 | Epithelial Stromal Interaction 1 ( <i>EPSTI1</i> )                           |
| 50 | Estrogen Receptor 1 ( <i>ESR1</i> )                                          |
| 51 | Estrogen Receptor 2 ( <i>ESR2</i> )                                          |
| 52 | Even-Skipped Homeobox 1 ( <i>EVX1</i> )                                      |
| 53 | Fibulin-1 ( <i>FBLN1</i> )                                                   |
| 54 | Fructose-Bisphosphatase 1 ( <i>FBP1</i> )                                    |
| 55 | FEV, ETS Transcription Factor ( <i>FEV</i> )                                 |

|    |                                                                                       |
|----|---------------------------------------------------------------------------------------|
| 56 | FEZ Family Zinc Finger 2 ( <i>FEZF2</i> )                                             |
| 57 | Fibroblast growth factor 8 ( <i>FGF8</i> )                                            |
| 58 | Fragile Histidine Triad ( <i>FHIT</i> )                                               |
| 59 | Filamin C ( <i>FLNC</i> )                                                             |
| 60 | Forkhead Box B2 ( <i>FOXB2</i> )                                                      |
| 61 | Forkhead Box D2 ( <i>FOXD2</i> )                                                      |
| 62 | Forkhead Box E3 ( <i>FOXE3</i> )                                                      |
| 63 | Gastrulation Brain Homeobox 2 ( <i>GBX2</i> )                                         |
| 64 | Glycoprotein V Platelet ( <i>GP5</i> )                                                |
| 65 | G Protein-Coupled Receptor 50 ( <i>GPR50</i> )                                        |
| 66 | Glutathione Peroxidase 3 ( <i>GPX3</i> )                                              |
| 67 | General Receptor For Phosphoinositides 1 Associated Scaffold Protein ( <i>GRASP</i> ) |
| 68 | Gremlin 1 ( <i>GREM1</i> )                                                            |
| 69 | Glutathione S-Transferase Pi 1 ( <i>GSTP1</i> )                                       |
| 70 | GS Homeobox 2 ( <i>GSX2</i> )                                                         |
| 71 | Hes Family BHLH Transcription Factor 5 ( <i>HES5</i> )                                |
| 72 | Hexosaminidase Subunit Alpha ( <i>HEXA</i> )                                          |
| 73 | Hemochromatosis ( <i>HFE</i> )                                                        |
| 74 | Hematopoietically Expressed Homeobox ( <i>HHEX</i> )                                  |
| 75 | Hypermethylated In Cancer 1 ( <i>HIC1</i> )                                           |
| 76 | Hypoxia Inducible Factor 3 Alpha Subunit ( <i>HIF3A</i> )                             |
| 77 | Histone Cluster 1 H4 Family Member F ( <i>HIST1H4F</i> )                              |
| 78 | HNF1 Homeobox B ( <i>HNF1B</i> )                                                      |
| 79 | Homeobox A11 ( <i>HOXA11</i> )                                                        |
| 80 | Homeobox A3 ( <i>HOXA3</i> )                                                          |
| 81 | Homeobox A9 ( <i>HOXA9</i> )                                                          |
| 82 | Homeobox B6 ( <i>HOXB6</i> )                                                          |
| 83 | Homeobox B8 ( <i>HOXB8</i> )                                                          |
| 84 | Homeobox C11 ( <i>HOXC11</i> )                                                        |

|     |                                                                        |
|-----|------------------------------------------------------------------------|
| 85  | Homeobox C13 ( <i>HOXC13</i> )                                         |
| 86  | Homeobox C4 ( <i>HOXC4</i> )                                           |
| 87  | Homeobox D3 ( <i>HOXD3</i> )                                           |
| 88  | Homeobox D4 ( <i>HOXD4</i> )                                           |
| 89  | Homeobox D8 ( <i>HOXD8</i> )                                           |
| 90  | Homeobox D9 ( <i>HOXD9</i> )                                           |
| 91  | Heparan Sulfate-Glucosamine 3-Sulfotransferase 1 ( <i>HS3ST1</i> )     |
| 92  | 5-Hydroxytryptamine Receptor 1B ( <i>HTR1B</i> )                       |
| 93  | Insulin Like Growth Factor Binding Protein 4 ( <i>IGFBP4</i> )         |
| 94  | Iroquois Homeobox 1 ( <i>IRX1</i> )                                    |
| 95  | Iroquois Homeobox 5 ( <i>IRX5</i> )                                    |
| 96  | Iroquois Homeobox 6 ( <i>IRX6</i> )                                    |
| 97  | ISL LIM Homeobox 2 ( <i>ISL2</i> )                                     |
| 98  | KIT Proto-Oncogene Receptor Tyrosine Kinase ( <i>KIT</i> )             |
| 99  | Kallikrein Related Peptidase 10 ( <i>KLK10</i> )                       |
| 100 | Lysosomal Associated Membrane Protein Family Member 5 ( <i>LAMP5</i> ) |
| 101 | Ladybird Homeobox 1 ( <i>LBX1</i> )                                    |
| 102 | LIM Homeobox 1 ( <i>LHX1</i> )                                         |
| 103 | LIM Homeobox 2 ( <i>LHX2</i> )                                         |
| 104 | LIM Homeobox 3 ( <i>LHX3</i> )                                         |
| 105 | LIM Homeobox 5 ( <i>LHX5</i> )                                         |
| 106 | LIM Homeobox 6 ( <i>LHX 6</i> )                                        |
| 107 | LIM Homeobox 9 ( <i>LHX 9</i> )                                        |
| 108 | LIM Homeobox Transcription Factor 1 Beta ( <i>LMX1B</i> )              |
| 109 | Lysophosphatidic Acid Receptor 1 ( <i>LPAR1</i> )                      |
| 110 | Meis Homeobox 2 ( <i>MEIS2</i> )                                       |
| 111 | Mesenchyme Homeobox 2 ( <i>MEOX2</i> )                                 |
| 112 | Microfibrillar Associated Protein 2 ( <i>MFAP2</i> )                   |
| 113 | O-6-Methylguanine-DNA Methyltransferase ( <i>MGMT</i> )                |

|     |                                                                 |
|-----|-----------------------------------------------------------------|
| 114 | Motor Neuron And Pancreas Homeobox 1 ( <i>MNX1</i> )            |
| 115 | Mps One Binder Kinase Activator-Like 3B ( <i>MOB3B</i> )        |
| 116 | Msh Homeobox 1 ( <i>MSX1</i> )                                  |
| 117 | NK2 Homeobox 1 ( <i>NKX2-1</i> )                                |
| 118 | NK2 Homeobox 2 ( <i>NKX2-2</i> )                                |
| 119 | NK2 Homeobox 3 ( <i>NKX2-3</i> )                                |
| 120 | NK2 Homeobox 5 ( <i>NKX2-5</i> )                                |
| 121 | One Cut Homeobox 2 ( <i>ONCUT2</i> )                            |
| 122 | Orthopedia Homeobox ( <i>OTP</i> )                              |
| 123 | Orthodenticle Homeobox 2 ( <i>OTX2</i> )                        |
| 124 | P Antigen Family, Member 4 ( <i>PAGE4</i> )                     |
| 125 | Paired Box Gene 3 ( <i>PAX3</i> )                               |
| 126 | Paired Box Gene 5 ( <i>PAX5</i> )                               |
| 127 | Platelet Derived Growth Factor Receptor Alpha ( <i>PDGFRA</i> ) |
| 128 | Platelet Derived Growth Factor Receptor Beta ( <i>PDGFRB</i> )  |
| 129 | Pancreatic And Duodenal Homeobox 1 ( <i>PDX1</i> )              |
| 130 | Paired Like Homeobox 2a ( <i>PHOX2A</i> )                       |
| 131 | Paired-like homeodomain transcription factor 2 ( <i>PITX2</i> ) |
| 132 | POU Class 3 Homeobox 2 ( <i>POU3F2</i> )                        |
| 133 | POU Class 3 Homeobox 3 ( <i>POU3F3</i> )                        |
| 134 | POU Class 4 Homeobox 1 ( <i>POU4F1</i> )                        |
| 135 | POU Class 4 Homeobox 3 ( <i>POUF3</i> )                         |
| 136 | Prominin 1 ( <i>PROM1</i> )                                     |
| 137 | Prostaglandin-Endoperoxide Synthase 2 ( <i>PTGS2</i> )          |
| 138 | Retinoic Acid Receptor Beta ( <i>RARβ</i> )                     |
| 139 | Ras Association Domain Family Member 1 ( <i>RASSF1</i> )        |
| 140 | Retina And Anterior Neural Fold Homeobox ( <i>RAX</i> )         |
| 141 | RB Transcriptional Corepressor 1 ( <i>RBI</i> )                 |
| 142 | Regulator Of G-Protein Signaling 12 ( <i>RGS12</i> )            |

|     |                                                           |
|-----|-----------------------------------------------------------|
| 143 | Rh Family C Glycoprotein ( <i>RHCG</i> )                  |
| 144 | Rho Family GTPase 2 ( <i>RND2</i> )                       |
| 145 | Runt Related Transcription Factor 3 ( <i>RUNX3</i> )      |
| 146 | S100 Calcium Binding Protein A6 ( <i>S100A6</i> )         |
| 147 | Stratifin ( <i>SFN</i> )                                  |
| 148 | SIX Homeobox 2 ( <i>SIX2</i> )                            |
| 149 | SIX Homeobox 6 ( <i>SIX6</i> )                            |
| 150 | Solute Carrier Family 16 Member 5 ( <i>SLC16A5</i> )      |
| 151 | Solute Carrier Family 22 Member 16 ( <i>SLC22A16</i> )    |
| 152 | SRY-Box 17 ( <i>SOX17</i> )                               |
| 153 | SRY-Box 9 ( <i>SOX9</i> )                                 |
| 154 | Spermatogenesis Associated 6 ( <i>SPATA6</i> )            |
| 155 | Somatostatin Receptor 1 ( <i>SSTR1</i> )                  |
| 156 | T-Box 15 ( <i>TBX15</i> )                                 |
| 157 | T-Box 3 ( <i>TBX3</i> )                                   |
| 158 | Transcription Factor AP-2 Alpha( <i>TFAP2A</i> )          |
| 159 | Transforming Growth Factor Beta 1 ( <i>TGFB1</i> )        |
| 160 | TIMP Metallopeptidase Inhibitor 3 ( <i>TIMP3</i> )        |
| 161 | T-Cell Leukemia Homeobox 1 ( <i>TLX1</i> )                |
| 162 | Transmembrane Protein 106A ( <i>TMEM106A</i> )            |
| 163 | Transmembrane Protein 176B ( <i>TMEM176B</i> )            |
| 164 | TNF Receptor Superfamily Member 10c ( <i>TNFRSF10C</i> )  |
| 165 | Tumor Protein P73 ( <i>TP73</i> )                         |
| 166 | Tropomyosin 4 ( <i>TPM4</i> )                             |
| 167 | Transcriptional Repressor GATA Binding 1 ( <i>TRPS1</i> ) |
| 168 | Urocortin ( <i>UCN</i> )                                  |
| 169 | UL16 Binding Protein 1 ( <i>ULBP1</i> )                   |
| 170 | Ventral Anterior Homeobox 1 ( <i>VAX1</i> )               |
| 171 | Visual System Homeobox 1 ( <i>VSX1</i> )                  |

|     |                                               |
|-----|-----------------------------------------------|
| 172 | WW And C2 Domain Containing 2 ( <i>WVC2</i> ) |
| 173 | WD Repeat Domain 86 ( <i>WDR86</i> )          |
| 174 | Wnt Family Member 16 ( <i>WNT16</i> )         |
| 175 | Wnt Family Member 2 ( <i>WNT2</i> )           |
| 176 | Wilms Tumor 1 ( <i>WT1</i> )                  |
| 177 | WT1 Antisense RNA ( <i>WT1-AS</i> )           |
| 178 | Zic Family Member 3 ( <i>ZIC3</i> )           |
| 179 | Zinc Finger Protein 154 ( <i>ZNF154</i> )     |
| 180 | Zinc Finger Protein 334 ( <i>ZNF334</i> )     |

**Table S2: Functional Gene Set enrichment analysis of identified DMGs associated with Prostate cancer**

| <b>GO.ID</b> | <b>Description</b>                                                                  | <b>P value</b> | <b>Genes</b>                                                         |
|--------------|-------------------------------------------------------------------------------------|----------------|----------------------------------------------------------------------|
| KEGG:05200   | Pathways in cancer                                                                  | 1.82E-08       | <i>CDH1,RASSF1,PTGS2,RARB,GSTP1,CDKN1B,APC,EDNRB,CDKN2A,AR,DAPK1</i> |
| GO:0045936   | negative regulation of phosphate metabolic process                                  | 3.24E-08       | <i>GSTP1,TIMP3,CAV1,CDKN1B,CDKN1C,APC,EDNRB,CDKN2A,SFN</i>           |
| GO:0010563   | negative regulation of phosphorus metabolic process                                 | 3.31E-08       | <i>GSTP1,TIMP3,CAV1,CDKN1B,CDKN1C,APC,EDNRB,CDKN2A,SFN</i>           |
| GO:0097190   | apoptotic signaling pathway                                                         | 3.90E-08       | <i>CD44,GSTP1,TIMP3,CAV1,AR,SFN,HIC1,FHIT,DAPK1</i>                  |
| GO:0033673   | negative regulation of kinase activity                                              | 4.17E-08       | <i>GSTP1,CAV1,CDKN1B,CDKN1C,APC,CDKN2A,SFN</i>                       |
| GO:0042326   | negative regulation of phosphorylation                                              | 7.17E-08       | <i>GSTP1,TIMP3,CAV1,CDKN1B,CDKN1C,APC,CDKN2A,SFN</i>                 |
| GO:0052547   | regulation of peptidase activity                                                    | 1.72E-07       | <i>CD44,TIMP3,CAV1,CDKN1B,CDKN2A,SFN,DAPK1</i>                       |
| GO:0008285   | negative regulation of cell proliferation                                           | 6.56E-07       | <i>GSTP1,CAV1,CDKN1B,CDKN1C,APC,CDH13,CDKN2A,AR</i>                  |
| GO:0051348   | negative regulation of transferase activity                                         | 7.07E-07       | <i>GSTP1,CAV1,CDKN1B,CDKN1C,APC,CDKN2A,SFN</i>                       |
| GO:0004879   | RNA polymerase II transcription factor activity, ligand-activated sequence-specific | 1.96E-06       | <i>RARB,ESR1,ESR2,AR</i>                                             |

|             |                                                                                      |          |                                                        |
|-------------|--------------------------------------------------------------------------------------|----------|--------------------------------------------------------|
|             | DNA binding                                                                          |          |                                                        |
| GO:0098531  | transcription factor activity, direct ligand regulated sequence-specific DNA binding | 2.16E-06 | <i>RARB,ESR1,ESR2,AR</i>                               |
| GO:0052548  | regulation of endopeptidase activity                                                 | 3.20E-06 | <i>CD44,TIMP3,CDKN1B,CDKN2A,SFN,DAPK1</i>              |
| KEGG:05206  | MicroRNAs in cancer                                                                  | 4.41E-06 | <i>CD44,RASSF1,PTGS2,TIMP3,CDKN1B,CCND2,APC,CDKN2A</i> |
| GO:0043065  | positive regulation of apoptotic process                                             | 7.75E-06 | <i>TIMP3,CAVI,CDKN1B,APC,CDKN2A,SFN,DAPK1</i>          |
| GO:0043068  | positive regulation of programmed cell death                                         | 8.42E-06 | <i>TIMP3,CAVI,CDKN1B,APC,CDKN2A,SFN,DAPK1</i>          |
| GO:2001233  | regulation of apoptotic signaling pathway                                            | 1.04E-05 | <i>CD44,GSTP1,TIMP3,CAVI,AR,SFN</i>                    |
| GO:0010942  | positive regulation of cell death                                                    | 1.13E-05 | <i>TIMP3,CAVI,CDKN1B,APC,CDKN2A,SFN,DAPK1</i>          |
| GO:0008013  | beta-catenin binding                                                                 | 1.30E-05 | <i>CDH1,ESR1,APC,AR</i>                                |
| GO:0043281  | regulation of cysteine-type endopeptidase activity involved in apoptotic process     | 1.38E-05 | <i>CD44,CDKN1B,CDKN2A,SFN,DAPK1</i>                    |
| GO:0000079  | regulation of cyclin-dependent protein serine/threonine kinase activity              | 1.38E-05 | <i>CDKN1B,CCND2,APC,CDKN2A</i>                         |
| GO:1904029  | regulation of cyclin-dependent protein kinase activity                               | 1.47E-05 | <i>CDKN1B,CCND2,APC,CDKN2A</i>                         |
| GO:0001933  | negative regulation of protein phosphorylation                                       | 1.68E-05 | <i>GSTP1,TIMP3,CAVI,APC,CDKN2A,SFN</i>                 |
| GO:0019207  | kinase regulator activity                                                            | 1.77E-05 | <i>GSTP1,CDKN1B,APC,CDKN2A,SFN</i>                     |
| GO:0006469  | negative regulation of protein kinase activity                                       | 2.38E-05 | <i>GSTP1,CAVI,APC,CDKN2A,SFN</i>                       |
| GO:2000116  | regulation of cysteine-type endopeptidase activity                                   | 2.73E-05 | <i>CD44,CDKN1B,CDKN2A,SFN,DAPK1</i>                    |
| GO:0003707  | steroid hormone receptor activity                                                    | 2.88E-05 | <i>ESR1,ESR2,AR</i>                                    |
| KEGG:05219  | Bladder cancer                                                                       | 2.92E-05 | <i>CDH1,RASSF1,CDKN2A,DAPK1</i>                        |
| REAC:383280 | Nuclear Receptor transcription pathway                                               | 3.27E-05 | <i>RARB,ESR1,ESR2,AR</i>                               |
| GO:0030291  | protein serine/threonine kinase inhibitor activity                                   | 3.66E-05 | <i>CDKN1B,CDKN2A,SFN</i>                               |



|                |                                                                 |          |                                           |
|----------------|-----------------------------------------------------------------|----------|-------------------------------------------|
| GO:0071901     | negative regulation of protein serine/threonine kinase activity | 3.71E-05 | <i>GSTP1,CAVI,APC,CDKN2A</i>              |
| GO:0034056     | estrogen response element binding                               | 5.18E-05 | <i>ESR1,ESR2</i>                          |
| CORUM:586<br>2 | CAV1-VDAC1-ESR1 complex                                         | 5.44E-05 | <i>ESR1,CAVI</i>                          |
| CORUM:164<br>2 | p16-cyclin D2-CDK4 complex                                      | 5.44E-05 | <i>CCND2,CDKN2A</i>                       |
| GO:0071900     | regulation of protein serine/threonine kinase activity          | 5.53E-05 | <i>GSTP1,CAVI,CDKN1B,CCND2,APC,CDKN2A</i> |
| GO:0097193     | intrinsic apoptotic signaling pathway                           | 5.59E-05 | <i>CD44,CAVI,SFN,HIC1,FHIT</i>            |
| GO:0007050     | cell cycle arrest                                               | 6.58E-05 | <i>RASSF1,CDKN1B,APC,CDKN2A,SFN</i>       |
| GO:0030330     | DNA damage response, signal transduction by p53 class mediator  | 6.96E-05 | <i>CD44,CDKN1B,SFN,HIC1</i>               |
| GO:0030284     | estrogen receptor activity                                      | 8.63E-05 | <i>ESR1,ESR2</i>                          |
| GO:2001236     | regulation of extrinsic apoptotic signaling pathway             | 8.72E-05 | <i>GSTP1,TIMP3,CAVI,AR</i>                |
| GO:0004601     | peroxidase activity                                             | 1.04E-04 | <i>PTGS2,GSTP1,GPX3</i>                   |
| GO:0072331     | signal transduction by p53 class mediator                       | 1.06E-04 | <i>CD44,CDKN1B,SFN,HIC1,FHIT</i>          |
| GO:0042770     | signal transduction in response to DNA damage                   | 1.12E-04 | <i>CD44,CDKN1B,SFN,HIC1</i>               |
| KEGG:05223     | Non-small cell lung cancer                                      | 1.18E-04 | <i>RASSF1,RARB,CDKN2A,FHIT</i>            |
| GO:0016684     | oxidoreductase activity, acting on peroxide as acceptor         | 1.22E-04 | <i>PTGS2,GSTP1,GPX3</i>                   |
| GO:0009894     | regulation of catabolic process                                 | 1.26E-04 | <i>TIMP3,CAVI,CDKN1B,APC,CDKN2A,FHIT</i>  |
| KEGG:04110     | Cell cycle                                                      | 1.33E-04 | <i>CDKN1B,CCND2,CDKN1C,CDKN2A,SFN</i>     |
| GO:1901990     | regulation of mitotic cell cycle phase transition               | 1.57E-04 | <i>CDKN1B,CCND2,APC,CDKN2A,SFN</i>        |
| GO:0042562     | hormone binding                                                 | 1.63E-04 | <i>EDNRB,CDH13,AR</i>                     |
| GO:1901987     | regulation of cell cycle phase transition                       | 2.07E-04 | <i>CDKN1B,CCND2,APC,CDKN2A,SFN</i>        |
| GO:0031400     | negative regulation of protein modification                     | 2.29E-04 | <i>GSTP1,TIMP3,CAVI,APC,CDKN2A,SFN</i>    |

|            |                                                                     |          |                                         |
|------------|---------------------------------------------------------------------|----------|-----------------------------------------|
|            | process                                                             |          |                                         |
| GO:0016342 | catenin complex                                                     | 2.41E-04 | <i>CDH1,APC</i>                         |
| GO:0033483 | gas homeostasis                                                     | 2.41E-04 | <i>GSTP1,CAVI</i>                       |
| GO:0005901 | caveola                                                             | 2.69E-04 | <i>CDH1,CAVI,CDH13</i>                  |
| GO:0019887 | protein kinase regulator activity                                   | 2.84E-04 | <i>CDKN1B,APC,CDKN2A,SFN</i>            |
| GO:0080135 | regulation of cellular response to stress                           | 2.94E-04 | <i>CD44,GSTP1,CAVI,CDKN2A,MGMT,HIC1</i> |
| GO:0072593 | reactive oxygen species metabolic process                           | 3.67E-04 | <i>PTGS2,GSTP1,CAVI,GPX3</i>            |
| GO:0042176 | regulation of protein catabolic process                             | 3.69E-04 | <i>TIMP3,CAVI,CDKN1B,APC,FHIT</i>       |
| GO:0044853 | plasma membrane raft                                                | 3.73E-04 | <i>CDH1,CAVI,CDH13</i>                  |
| GO:0004861 | cyclin-dependent protein serine/threonine kinase inhibitor activity | 3.87E-04 | <i>CDKN1B,CDKN2A</i>                    |
| GO:0045861 | negative regulation of proteolysis                                  | 3.95E-04 | <i>CD44,TIMP3,SFN,FHIT</i>              |
| GO:0071407 | cellular response to organic cyclic compound                        | 3.98E-04 | <i>CDH1,ESR1,CAVI,ESR2,AR</i>           |
| GO:0097191 | extrinsic apoptotic signaling pathway                               | 4.24E-04 | <i>GSTP1,TIMP3,CAVI,AR</i>              |
| GO:0051117 | ATPase binding                                                      | 4.34E-04 | <i>ESR1,CAVI,AR</i>                     |
| GO:0006367 | transcription initiation from RNA polymerase II promoter            | 4.55E-04 | <i>RARB,ESR1,ESR2,AR</i>                |
| GO:0048545 | response to steroid hormone                                         | 4.66E-04 | <i>ESR1,CAVI,ESR2,AR</i>                |
| GO:0016209 | antioxidant activity                                                | 5.01E-04 | <i>PTGS2,GSTP1,GPX3</i>                 |
| GO:0030178 | negative regulation of Wnt signaling pathway                        | 5.23E-04 | <i>DKK3,CAVI,APC,HIC1</i>               |
| GO:0045295 | gamma-catenin binding                                               | 5.66E-04 | <i>CDH1,APC</i>                         |
| GO:0045216 | cell-cell junction organization                                     | 6.10E-04 | <i>CDH1,CAVI,APC,CDH13</i>              |
| KEGG:05222 | Small cell lung cancer                                              | 6.14E-04 | <i>PTGS2,RARB,CDKN1B,FHIT</i>           |
| GO:0005496 | steroid binding                                                     | 6.54E-04 | <i>ESR1,CAVI,ESR2</i>                   |
| REAC:69236 | G1 Phase                                                            | 6.69E-04 | <i>CDKN1B,CCND2,CDKN2A</i>              |
| REAC:69231 | Cyclin D associated events in G1                                    | 6.69E-04 | <i>CDKN1B,CCND2,CDKN2A</i>              |
| GO:0008630 | intrinsic apoptotic signaling pathway in                            | 7.41E-04 | <i>CD44,SFN,HIC1</i>                    |

|                 |                                                                                           |          |                                       |
|-----------------|-------------------------------------------------------------------------------------------|----------|---------------------------------------|
|                 | response to DNA damage                                                                    |          |                                       |
| GO:0000082      | G1/S transition of mitotic cell cycle                                                     | 8.48E-04 | <i>CDKN1B,CCND2,CDKN2A,SFN</i>        |
| GO:0004860      | protein kinase inhibitor activity                                                         | 8.68E-04 | <i>CDKN1B,CDKN2A,SFN</i>              |
| GO:0017015      | regulation of transforming growth factor beta receptor signaling pathway                  | 8.68E-04 | <i>DKK3,CAVI,CDKN1C</i>               |
| GO:1903844      | regulation of cellular response to transforming growth factor beta stimulus               | 8.68E-04 | <i>DKK3,CAVI,CDKN1C</i>               |
| GO:1902532      | negative regulation of intracellular signal transduction                                  | 9.49E-04 | <i>CD44,GSTP1,ESR1,TIMP3,CAVI</i>     |
| KEGG:01522      | Endocrine resistance                                                                      | 9.70E-04 | <i>ESR1,CDKN1B,ESR2,CDKN2A</i>        |
| GO:0019210      | kinase inhibitor activity                                                                 | 9.71E-04 | <i>CDKN1B,CDKN2A,SFN</i>              |
| GO:0006352      | DNA-templated transcription, initiation                                                   | 9.89E-04 | <i>RARB,ESR1,ESR2,AR</i>              |
| GO:0034330      | cell junction organization                                                                | 1.01E-03 | <i>CDH1,CAVI,APC,CDH13</i>            |
| GO:0045736      | negative regulation of cyclin-dependent protein serine/threonine kinase activity          | 1.02E-03 | <i>APC,CDKN2A</i>                     |
| GO:1904030      | negative regulation of cyclin-dependent protein kinase activity                           | 1.02E-03 | <i>APC,CDKN2A</i>                     |
| GO:0004602      | glutathione peroxidase activity                                                           | 1.02E-03 | <i>GSTP1,GPX3</i>                     |
| GO:0044843      | cell cycle G1/S phase transition                                                          | 1.03E-03 | <i>CDKN1B,CCND2,CDKN2A,SFN</i>        |
| GO:0000785      | chromatin                                                                                 | 1.17E-03 | <i>ESR1,CCND2,CDKN2A,AR,HIC1</i>      |
| GO:0019901      | protein kinase binding                                                                    | 1.30E-03 | <i>GSTP1,CAVI,CCND2,APC,CDKN2A</i>    |
| OMIM:17680<br>7 | Prostate cancer                                                                           | 1.40E-03 | <i>CDH1,AR</i>                        |
| GO:0014070      | response to organic cyclic compound                                                       | 1.52E-03 | <i>CDH1,ESR1,CAVI,ESR2,AR</i>         |
| GO:0007346      | regulation of mitotic cell cycle                                                          | 1.55E-03 | <i>CDKN1B,CCND2,APC,CDKN2A,SFN</i>    |
| HP:0007379      | Neoplasm of the genitourinary tract                                                       | 1.60E-03 | <i>CDH1,CDKN1B,CDKN1C,APC,AR,FHIT</i> |
| GO:0043280      | positive regulation of cysteine-type endopeptidase activity involved in apoptotic process | 1.66E-03 | <i>CDKN1B,CDKN2A,DAPK1</i>            |
| HP:0100641      | Neoplasm of the adrenal cortex                                                            | 1.83E-03 | <i>CDKN1B,CDKN1C,APC</i>              |

|            |                                                                              |          |                                     |
|------------|------------------------------------------------------------------------------|----------|-------------------------------------|
| GO:2000377 | regulation of reactive oxygen species metabolic process                      | 1.87E-03 | <i>PTGS2,GSTP1,CAVI</i>             |
| GO:0010951 | negative regulation of endopeptidase activity                                | 1.93E-03 | <i>CD44,TIMP3,SFN</i>               |
| GO:0033993 | response to lipid                                                            | 1.95E-03 | <i>GSTP1,ESR1,CAVI,ESR2,AR</i>      |
| GO:0016538 | cyclin-dependent protein serine/threonine kinase regulator activity          | 1.96E-03 | <i>CDKN1B,CDKN2A</i>                |
| GO:1904886 | beta-catenin destruction complex disassembly                                 | 1.96E-03 | <i>CAVI,APC</i>                     |
| GO:0044772 | mitotic cell cycle phase transition                                          | 2.05E-03 | <i>CDKN1B,CCND2,APC,CDKN2A,SFN</i>  |
| GO:0030155 | regulation of cell adhesion                                                  | 2.10E-03 | <i>CD44,CDH1,CAVI,CDH13,CDKN2A</i>  |
| GO:0045786 | negative regulation of cell cycle                                            | 2.12E-03 | <i>RASSF1,CDKN1B,APC,CDKN2A,SFN</i> |
| GO:2001056 | positive regulation of cysteine-type endopeptidase activity                  | 2.16E-03 | <i>CDKN1B,CDKN2A,DAPK1</i>          |
| GO:0019900 | kinase binding                                                               | 2.27E-03 | <i>GSTP1,CAVI,CCND2,APC,CDKN2A</i>  |
| GO:0010466 | negative regulation of peptidase activity                                    | 2.34E-03 | <i>CD44,TIMP3,SFN</i>               |
| GO:0043409 | negative regulation of MAPK cascade                                          | 2.41E-03 | <i>GSTP1,TIMP3,CAVI</i>             |
| GO:0019897 | extrinsic component of plasma membrane                                       | 2.47E-03 | <i>CDH1,APC,S100A6</i>              |
| GO:0044770 | cell cycle phase transition                                                  | 2.51E-03 | <i>CDKN1B,CCND2,APC,CDKN2A,SFN</i>  |
| GO:0030111 | regulation of Wnt signaling pathway                                          | 2.53E-03 | <i>DKK3,CAVI,APC,HIC1</i>           |
| GO:2000045 | regulation of G1/S transition of mitotic cell cycle                          | 2.54E-03 | <i>CDKN1B,CCND2,SFN</i>             |
| GO:0030518 | intracellular steroid hormone receptor signaling pathway                     | 2.60E-03 | <i>ESR1,ESR2,AR</i>                 |
| GO:0010950 | positive regulation of endopeptidase activity                                | 2.67E-03 | <i>CDKN1B,CDKN2A,DAPK1</i>          |
| GO:0010564 | regulation of cell cycle process                                             | 2.74E-03 | <i>CDKN1B,CCND2,APC,CDKN2A,SFN</i>  |
| GO:0043516 | regulation of DNA damage response, signal transduction by p53 class mediator | 2.75E-03 | <i>CD44,HIC1</i>                    |
| GO:0022407 | regulation of cell-cell adhesion                                             | 2.79E-03 | <i>CD44,CDH1,CAVI,CDKN2A</i>        |

|                  |                                                                      |          |                                            |
|------------------|----------------------------------------------------------------------|----------|--------------------------------------------|
| GO:0022411       | cellular component disassembly                                       | 2.82E-03 | <i>CD44,CDH1,CAVI,APC,CDKN2A</i>           |
| GO:0043401       | steroid hormone mediated signaling pathway                           | 2.88E-03 | <i>ESR1,ESR2,AR</i>                        |
| GO:0016328       | lateral plasma membrane                                              | 2.97E-03 | <i>CDH1,APC</i>                            |
| GO:0010952       | positive regulation of peptidase activity                            | 3.03E-03 | <i>CDKN1B,CDKN2A,DAPK1</i>                 |
| GO:2001235       | positive regulation of apoptotic signaling pathway                   | 3.11E-03 | <i>TIMP3,CAVI,SFN</i>                      |
| GO:1902806       | regulation of cell cycle G1/S phase transition                       | 3.26E-03 | <i>CDKN1B,CCND2,SFN</i>                    |
| GO:0000122       | negative regulation of transcription from RNA polymerase II promoter | 3.43E-03 | <i>ESR1,CAVI,EDNRB,ESR2,HIC1</i>           |
| GO:0048732       | gland development                                                    | 3.50E-03 | <i>DKK3,CAVI,AR</i>                        |
| GO:0043627       | response to estrogen                                                 | 3.66E-03 | <i>ESR1,CAVI</i>                           |
| GO:2001238       | positive regulation of extrinsic apoptotic signaling pathway         | 3.91E-03 | <i>TIMP3,CAVI</i>                          |
| GO:0045428       | regulation of nitric oxide biosynthetic process                      | 3.91E-03 | <i>PTGS2,CAVI</i>                          |
| GO:0016504       | peptidase activator activity                                         | 3.91E-03 | <i>CAVI,CDKN1B</i>                         |
| GO:0030308       | negative regulation of cell growth                                   | 3.92E-03 | <i>CDKN1B,ESR2,CDKN2A</i>                  |
| REAC:10958<br>1  | Apoptosis                                                            | 3.95E-03 | <i>CDH1,APC,SFN,DAPK1</i>                  |
| GO:0004857       | enzyme inhibitor activity                                            | 4.00E-03 | <i>TIMP3,CDKN1B,CDKN2A,SFN</i>             |
| GO:1901991       | negative regulation of mitotic cell cycle phase transition           | 4.01E-03 | <i>CDKN1B,APC,SFN</i>                      |
| HP:0007378       | Neoplasm of the gastrointestinal tract                               | 4.13E-03 | <i>CDH1,CDKN1B,CDKN1C,APC,EDNRB,CDKN2A</i> |
| GO:2001020       | regulation of response to DNA damage stimulus                        | 4.19E-03 | <i>CD44,MGMT,HIC1</i>                      |
| REAC:53578<br>01 | Programmed Cell Death                                                | 4.22E-03 | <i>CDH1,APC,SFN,DAPK1</i>                  |
| GO:0010565       | regulation of cellular ketone metabolic process                      | 4.28E-03 | <i>DKK3,PTGS2,CAVI</i>                     |

|             |                                                                              |          |                                 |
|-------------|------------------------------------------------------------------------------|----------|---------------------------------|
| GO:0045862  | positive regulation of proteolysis                                           | 4.31E-03 | <i>CAVI,CDKN1B,CDKN2A,DAPK1</i> |
| GO:0045296  | cadherin binding                                                             | 4.42E-03 | <i>CDH1,APC,CDH13,SFN</i>       |
| GO:1901988  | negative regulation of cell cycle phase transition                           | 4.47E-03 | <i>CDKN1B,APC,SFN</i>           |
| GO:0071383  | cellular response to steroid hormone stimulus                                | 4.47E-03 | <i>ESR1,ESR2,AR</i>             |
| GO:0071396  | cellular response to lipid                                                   | 4.53E-03 | <i>GSTP1,ESR1,ESR2,AR</i>       |
| GO:0070664  | negative regulation of leukocyte proliferation                               | 4.71E-03 | <i>GSTP1,CDKN2A</i>             |
| GO:0007179  | transforming growth factor beta receptor signaling pathway                   | 4.86E-03 | <i>DKK3,CAVI,CDKN1C</i>         |
| KEGG:04390  | Hippo signaling pathway                                                      | 5.10E-03 | <i>CDH1,RASSF1,CCND2,APC</i>    |
| OMIM:114480 | BREAST CANCER;;BREAST CANCER, FAMILIALBREAST CANCER, FAMILIAL MALE, INCLUDED | 5.24E-03 | <i>CDH1,ESR1</i>                |
| GO:0070373  | negative regulation of ERK1 and ERK2 cascade                                 | 5.27E-03 | <i>GSTP1,TIMP3</i>              |
| GO:0009755  | hormone-mediated signaling pathway                                           | 5.28E-03 | <i>ESR1,ESR2,AR</i>             |
| GO:0007093  | mitotic cell cycle checkpoint                                                | 5.38E-03 | <i>CDKN1B,APC,SFN</i>           |
| GO:0010038  | response to metal ion                                                        | 5.38E-03 | <i>CDH1,CAVI,CDKN1B</i>         |
| GO:0031329  | regulation of cellular catabolic process                                     | 5.41E-03 | <i>TIMP3,CAVI,CDKN2A,FHIT</i>   |
| GO:0090090  | negative regulation of canonical Wnt signaling pathway                       | 5.49E-03 | <i>DKK3,CAVI,APC</i>            |
| GO:0051090  | regulation of sequence-specific DNA binding transcription factor activity    | 5.54E-03 | <i>ESR1,ESR2,CDKN2A,AR</i>      |
| KEGG:04115  | p53 signaling pathway                                                        | 5.64E-03 | <i>CCND2,CDKN2A,SFN</i>         |
| GO:0007160  | cell-matrix adhesion                                                         | 5.71E-03 | <i>CD44,CDH13,CDKN2A</i>        |
| GO:2001234  | negative regulation of apoptotic signaling pathway                           | 5.94E-03 | <i>CD44,GSTP1,AR</i>            |
| GO:1903426  | regulation of reactive oxygen species biosynthetic process                   | 6.51E-03 | <i>PTGS2,CAVI</i>               |

|            |                                                                                        |          |                              |
|------------|----------------------------------------------------------------------------------------|----------|------------------------------|
| GO:0042310 | vasoconstriction                                                                       | 6.51E-03 | <i>CAVI,EDNRB</i>            |
| GO:0006809 | nitric oxide biosynthetic process                                                      | 6.51E-03 | <i>PTGS2,CAVI</i>            |
| GO:0007162 | negative regulation of cell adhesion                                                   | 6.52E-03 | <i>CDH1,CDH13,CDKN2A</i>     |
| GO:0030520 | intracellular estrogen receptor signaling pathway                                      | 6.83E-03 | <i>ESR1,ESR2</i>             |
| KEGG:04917 | Prolactin signaling pathway                                                            | 6.92E-03 | <i>ESR1,CCND2,ESR2</i>       |
| GO:0061134 | peptidase regulator activity                                                           | 7.02E-03 | <i>TIMP3,CAVI,CDKN1B</i>     |
| GO:0090092 | regulation of transmembrane receptor protein serine/threonine kinase signaling pathway | 7.02E-03 | <i>DKK3,CAVI,CDKN1C</i>      |
| GO:0016049 | cell growth                                                                            | 7.07E-03 | <i>CDKN1B,ESR2,CDKN2A,AR</i> |
| GO:0045121 | membrane raft                                                                          | 7.15E-03 | <i>CDH1,CAVI,CDH13</i>       |
| GO:0046209 | nitric oxide metabolic process                                                         | 7.17E-03 | <i>PTGS2,CAVI</i>            |
| GO:0098857 | membrane microdomain                                                                   | 7.27E-03 | <i>CDH1,CAVI,CDH13</i>       |
| GO:0071359 | cellular response to dsRNA                                                             | 7.51E-03 | <i>ESR1,CAVI</i>             |
| GO:0071560 | cellular response to transforming growth factor beta stimulus                          | 7.54E-03 | <i>DKK3,CAVI,CDKN1C</i>      |
| GO:0045926 | negative regulation of growth                                                          | 7.54E-03 | <i>CDKN1B,ESR2,CDKN2A</i>    |
| GO:0090287 | regulation of cellular response to growth factor stimulus                              | 7.67E-03 | <i>DKK3,CAVI,CDKN1C</i>      |
| GO:0071559 | response to transforming growth factor beta                                            | 7.80E-03 | <i>DKK3,CAVI,CDKN1C</i>      |
| GO:0048145 | regulation of fibroblast proliferation                                                 | 7.86E-03 | <i>GSTP1,S100A6</i>          |
| GO:0043124 | negative regulation of I-kappaB kinase/NF-kappaB signaling                             | 7.86E-03 | <i>GSTP1,ESR1</i>            |
| GO:2001057 | reactive nitrogen species metabolic process                                            | 7.86E-03 | <i>PTGS2,CAVI</i>            |
| GO:0048144 | fibroblast proliferation                                                               | 8.22E-03 | <i>GSTP1,S100A6</i>          |
| GO:0005925 | focal adhesion                                                                         | 8.26E-03 | <i>CD44,CDH1,CAVI,CDH13</i>  |
| GO:0005924 | cell-substrate adherens junction                                                       | 8.43E-03 | <i>CD44,CDH1,CAVI,CDH13</i>  |
| GO:0006921 | cellular component disassembly involved                                                | 8.58E-03 | <i>APC,CDKN2A</i>            |

|            |                                                                         |          |                                 |
|------------|-------------------------------------------------------------------------|----------|---------------------------------|
|            | in execution phase of apoptosis                                         |          |                                 |
| GO:0007156 | homophilic cell adhesion via plasma membrane adhesion molecules         | 8.58E-03 | <i>CDH1,CDH13</i>               |
| GO:0030055 | cell-substrate junction                                                 | 8.77E-03 | <i>CD44,CDH1,CAVI,CDH13</i>     |
| GO:0050678 | regulation of epithelial cell proliferation                             | 9.38E-03 | <i>CAVI,CDKN1C,CDH13</i>        |
| GO:0016055 | Wnt signaling pathway                                                   | 9.68E-03 | <i>DKK3,CAVI,APC,HIC1</i>       |
| GO:0198738 | cell-cell signaling by wnt                                              | 9.77E-03 | <i>DKK3,CAVI,APC,HIC1</i>       |
| GO:0042180 | cellular ketone metabolic process                                       | 1.00E-02 | <i>DKK3,PTGS2,CAVI</i>          |
| GO:0072332 | intrinsic apoptotic signaling pathway by p53 class mediator             | 1.05E-02 | <i>CD44,FHIT</i>                |
| GO:0006939 | smooth muscle contraction                                               | 1.05E-02 | <i>CAVI,EDNRB</i>               |
| GO:1990778 | protein localization to cell periphery                                  | 1.08E-02 | <i>CDH1,CAVI,AR</i>             |
| GO:1903409 | reactive oxygen species biosynthetic process                            | 1.13E-02 | <i>PTGS2,CAVI</i>               |
| GO:0070372 | regulation of ERK1 and ERK2 cascade                                     | 1.18E-02 | <i>CD44,GSTP1,TIMP3</i>         |
| GO:0010948 | negative regulation of cell cycle process                               | 1.20E-02 | <i>CDKN1B,APC,SFN</i>           |
| GO:0051301 | cell division                                                           | 1.22E-02 | <i>APC,CDKN2A,SFN</i>           |
| GO:0002673 | regulation of acute inflammatory response                               | 1.22E-02 | <i>PTGS2,GSTP1</i>              |
| KEGG:05215 | Prostate cancer                                                         | 1.26E-02 | <i>GSTP1,CDKN1B,AR</i>          |
| GO:0051345 | positive regulation of hydrolase activity                               | 1.26E-02 | <i>ESR1,CDKN1B,CDKN2A,DAPK1</i> |
| GO:0048660 | regulation of smooth muscle cell proliferation                          | 1.26E-02 | <i>CDKN1B,CDH13</i>             |
| GO:2000379 | positive regulation of reactive oxygen species metabolic process        | 1.26E-02 | <i>PTGS2,GSTP1</i>              |
| HP:0100631 | Neoplasm of the adrenal gland                                           | 1.27E-02 | <i>CDKN1B,CDKN1C,APC</i>        |
| GO:0045930 | negative regulation of mitotic cell cycle                               | 1.27E-02 | <i>CDKN1B,APC,SFN</i>           |
| GO:1905114 | cell surface receptor signaling pathway involved in cell-cell signaling | 1.29E-02 | <i>DKK3,CAVI,APC,HIC1</i>       |
| GO:0090068 | positive regulation of cell cycle process                               | 1.29E-02 | <i>CDKN1B,CCND2,SFN</i>         |
| GO:0007265 | Ras protein signal transduction                                         | 1.29E-02 | <i>RASSF1,CDH13,CDKN2A</i>      |



|            |                                                                                               |          |                            |
|------------|-----------------------------------------------------------------------------------------------|----------|----------------------------|
| GO:0098589 | membrane region                                                                               | 1.31E-02 | <i>CDH1,CAVI,CDH13</i>     |
| GO:0060828 | regulation of canonical Wnt signaling pathway                                                 | 1.31E-02 | <i>DKK3,CAVI,APC</i>       |
| GO:0030522 | intracellular receptor signaling pathway                                                      | 1.33E-02 | <i>ESR1,ESR2,AR</i>        |
| GO:0032870 | cellular response to hormone stimulus                                                         | 1.34E-02 | <i>ESR1,CAVI,ESR2,AR</i>   |
| GO:0019217 | regulation of fatty acid metabolic process                                                    | 1.35E-02 | <i>PTGS2,CAVI</i>          |
| GO:0043407 | negative regulation of MAP kinase activity                                                    | 1.35E-02 | <i>GSTP1,CAVI</i>          |
| GO:0048659 | smooth muscle cell proliferation                                                              | 1.35E-02 | <i>CDKN1B,CDH13</i>        |
| GO:0048565 | digestive tract development                                                                   | 1.40E-02 | <i>RARB,EDNRB</i>          |
| GO:0070371 | ERK1 and ERK2 cascade                                                                         | 1.41E-02 | <i>CD44,GSTP1,TIMP3</i>    |
| GO:0051091 | positive regulation of sequence-specific DNA binding transcription factor activity            | 1.41E-02 | <i>ESR1,ESR2,AR</i>        |
| GO:0008134 | transcription factor binding                                                                  | 1.41E-02 | <i>ESR1,CDKN2A,AR,GPX3</i> |
| GO:0050673 | epithelial cell proliferation                                                                 | 1.43E-02 | <i>CAVI,CDKN1C,CDH13</i>   |
| GO:0000075 | cell cycle checkpoint                                                                         | 1.43E-02 | <i>CDKN1B,APC,SFN</i>      |
| GO:0019216 | regulation of lipid metabolic process                                                         | 1.44E-02 | <i>DKK3,PTGS2,CAVI</i>     |
| GO:0019898 | extrinsic component of membrane                                                               | 1.44E-02 | <i>CDH1,APC,S100A6</i>     |
| GO:0006977 | DNA damage response, signal transduction by p53 class mediator resulting in cell cycle arrest | 1.45E-02 | <i>CDKN1B,SFN</i>          |
| GO:0031330 | negative regulation of cellular catabolic process                                             | 1.45E-02 | <i>TIMP3,FHIT</i>          |
| GO:0031252 | cell leading edge                                                                             | 1.46E-02 | <i>CDH1,APC,S100A6</i>     |
| GO:0072431 | signal transduction involved in mitotic G1 DNA damage checkpoint                              | 1.49E-02 | <i>CDKN1B,SFN</i>          |
| GO:1902400 | intracellular signal transduction involved in G1 DNA damage checkpoint                        | 1.49E-02 | <i>CDKN1B,SFN</i>          |
| GO:0043154 | negative regulation of cysteine-type endopeptidase activity involved in apoptotic process     | 1.49E-02 | <i>CD44,SFN</i>            |

|            |                                                                  |          |                              |
|------------|------------------------------------------------------------------|----------|------------------------------|
| GO:0072413 | signal transduction involved in mitotic cell cycle checkpoint    | 1.54E-02 | <i>CDKN1B,SFN</i>            |
| GO:1902402 | signal transduction involved in mitotic DNA damage checkpoint    | 1.54E-02 | <i>CDKN1B,SFN</i>            |
| GO:1902403 | signal transduction involved in mitotic DNA integrity checkpoint | 1.54E-02 | <i>CDKN1B,SFN</i>            |
| GO:2001022 | positive regulation of response to DNA damage stimulus           | 1.54E-02 | <i>MGMT,HIC1</i>             |
| GO:1903037 | regulation of leukocyte cell-cell adhesion                       | 1.55E-02 | <i>CD44,CAVI,CDKN2A</i>      |
| KEGG:05205 | Proteoglycans in cancer                                          | 1.56E-02 | <i>CD44,ESR1,TIMP3,CAVI</i>  |
| GO:0050839 | cell adhesion molecule binding                                   | 1.58E-02 | <i>CDH1,APC,CDH13,SFN</i>    |
| GO:0072657 | protein localization to membrane                                 | 1.58E-02 | <i>CDH1,CAVI,AR,SFN</i>      |
| GO:0055123 | digestive system development                                     | 1.59E-02 | <i>RARB,EDNRB</i>            |
| GO:0031589 | cell-substrate adhesion                                          | 1.63E-02 | <i>CD44,CDH13,CDKN2A</i>     |
| GO:0007009 | plasma membrane organization                                     | 1.63E-02 | <i>CDH1,CAVI,AR</i>          |
| GO:0071363 | cellular response to growth factor stimulus                      | 1.64E-02 | <i>CD44,DKK3,CAVI,CDKN1C</i> |
| GO:0097746 | regulation of blood vessel diameter                              | 1.64E-02 | <i>CAVI,EDNRB</i>            |
| GO:0035296 | regulation of tube diameter                                      | 1.64E-02 | <i>CAVI,EDNRB</i>            |
| GO:0072422 | signal transduction involved in DNA damage checkpoint            | 1.64E-02 | <i>CDKN1B,SFN</i>            |
| GO:0001046 | core promoter sequence-specific DNA binding                      | 1.64E-02 | <i>ESR1,ESR2</i>             |
| GO:0072401 | signal transduction involved in DNA integrity checkpoint         | 1.64E-02 | <i>CDKN1B,SFN</i>            |
| GO:0043331 | response to dsRNA                                                | 1.69E-02 | <i>ESR1,CAVI</i>             |
| GO:0050680 | negative regulation of epithelial cell proliferation             | 1.69E-02 | <i>CAVI,CDKN1C</i>           |
| GO:0072395 | signal transduction involved in cell cycle checkpoint            | 1.69E-02 | <i>CDKN1B,SFN</i>            |
| GO:0045732 | positive regulation of protein catabolic                         | 1.69E-02 | <i>CAVI,CDKN1B,APC</i>       |

|              |                                                                                  |          |                              |
|--------------|----------------------------------------------------------------------------------|----------|------------------------------|
|              | process                                                                          |          |                              |
| GO:0070848   | response to growth factor                                                        | 1.79E-02 | <i>CD44,DKK3,CAVI,CDKN1C</i> |
| GO:0002040   | sprouting angiogenesis                                                           | 1.80E-02 | <i>PTGS2,CDH13</i>           |
| GO:0035150   | regulation of tube size                                                          | 1.80E-02 | <i>CAVI,EDNRB</i>            |
| GO:0050880   | regulation of blood vessel size                                                  | 1.80E-02 | <i>CAVI,EDNRB</i>            |
| GO:0001952   | regulation of cell-matrix adhesion                                               | 1.85E-02 | <i>CDH13,CDKN2A</i>          |
| GO:0006919   | activation of cysteine-type endopeptidase activity involved in apoptotic process | 1.85E-02 | <i>CDKN1B,CDKN2A</i>         |
| GO:0044819   | mitotic G1/S transition checkpoint                                               | 1.85E-02 | <i>CDKN1B,SFN</i>            |
| GO:0031571   | mitotic G1 DNA damage checkpoint                                                 | 1.85E-02 | <i>CDKN1B,SFN</i>            |
| GO:0010035   | response to inorganic substance                                                  | 1.85E-02 | <i>CDH1,CAVI,CDKN1B</i>      |
| GO:0098590   | plasma membrane region                                                           | 1.88E-02 | <i>CDH1,CAVI,APC,CDH13</i>   |
| GO:0042177   | negative regulation of protein catabolic process                                 | 1.90E-02 | <i>TIMP3,FHIT</i>            |
| GO:0044783   | G1 DNA damage checkpoint                                                         | 1.90E-02 | <i>CDKN1B,SFN</i>            |
| GO:0097194   | execution phase of apoptosis                                                     | 2.01E-02 | <i>APC,CDKN2A</i>            |
| GO:0033138   | positive regulation of peptidyl-serine phosphorylation                           | 2.01E-02 | <i>CD44,CAVI</i>             |
| GO:0051346   | negative regulation of hydrolase activity                                        | 2.04E-02 | <i>CD44,TIMP3,SFN</i>        |
| HP:0008256   | Adrenocortical adenoma                                                           | 2.10E-02 | <i>CDKN1B,APC</i>            |
| REAC:4641262 | Disassembly of the destruction complex and recruitment of AXIN to the membrane   | 2.10E-02 | <i>CAVI,APC</i>              |
| REAC:418990  | Adherens junctions interactions                                                  | 2.10E-02 | <i>CDH1,CDH13</i>            |
| GO:0030856   | regulation of epithelial cell differentiation                                    | 2.12E-02 | <i>CAVI,SFN</i>              |
| GO:0040007   | growth                                                                           | 2.17E-02 | <i>CDKN1B,ESR2,CDKN2A,AR</i> |
| GO:0001676   | long-chain fatty acid metabolic process                                          | 2.18E-02 | <i>PTGS2,GSTP1</i>           |
| GO:0007043   | cell-cell junction assembly                                                      | 2.18E-02 | <i>CAVI,APC</i>              |
| GO:0007178   | transmembrane receptor protein serine/threonine kinase signaling pathway         | 2.19E-02 | <i>DKK3,CAVI,CDKN1C</i>      |

|                  |                                                                                |          |                           |
|------------------|--------------------------------------------------------------------------------|----------|---------------------------|
| GO:0060070       | canonical Wnt signaling pathway                                                | 2.22E-02 | <i>DKK3,CAVI,APC</i>      |
| GO:2000117       | negative regulation of cysteine-type endopeptidase activity                    | 2.24E-02 | <i>CD44,SFN</i>           |
| GO:2001237       | negative regulation of extrinsic apoptotic signaling pathway                   | 2.24E-02 | <i>GSTP1,AR</i>           |
| GO:0009725       | response to hormone                                                            | 2.24E-02 | <i>ESR1,CAVI,ESR2,AR</i>  |
| GO:0071248       | cellular response to metal ion                                                 | 2.29E-02 | <i>CDH1,CDKN1B</i>        |
| GO:0071158       | positive regulation of cell cycle arrest                                       | 2.35E-02 | <i>CDKN1B,SFN</i>         |
| GO:0002526       | acute inflammatory response                                                    | 2.35E-02 | <i>PTGS2,GSTP1</i>        |
| GO:0043296       | apical junction complex                                                        | 2.41E-02 | <i>CDH1,APC</i>           |
| REAC:32996<br>85 | Detoxification of Reactive Oxygen Species                                      | 2.53E-02 | <i>GSTP1,GPX3</i>         |
| GO:0033002       | muscle cell proliferation                                                      | 2.53E-02 | <i>CDKN1B,CDH13</i>       |
| GO:0001936       | regulation of endothelial cell proliferation                                   | 2.60E-02 | <i>CAVI,CDH13</i>         |
| GO:0045785       | positive regulation of cell adhesion                                           | 2.65E-02 | <i>CD44,CAVI,CDH13</i>    |
| GO:0000981       | RNA polymerase II transcription factor activity, sequence-specific DNA binding | 2.70E-02 | <i>RARB,ESR1,ESR2,AR</i>  |
| GO:0003018       | vascular process in circulatory system                                         | 2.72E-02 | <i>CAVI,EDNRB</i>         |
| GO:2000134       | negative regulation of G1/S transition of mitotic cell cycle                   | 2.78E-02 | <i>CDKN1B,SFN</i>         |
| GO:2001257       | regulation of cation channel activity                                          | 2.78E-02 | <i>CAVI,DAPK1</i>         |
| GO:0032434       | regulation of proteasomal ubiquitin-dependent protein catabolic process        | 2.78E-02 | <i>CAVI,FHIT</i>          |
| GO:0022408       | negative regulation of cell-cell adhesion                                      | 2.78E-02 | <i>CDH1,CDKN2A</i>        |
| GO:0045787       | positive regulation of cell cycle                                              | 2.86E-02 | <i>CDKN1B,CCND2,SFN</i>   |
| REAC:19525<br>8  | RHO GTPase Effectors                                                           | 2.90E-02 | <i>CDH1,CDKN1B,AR,SFN</i> |
| GO:0022617       | extracellular matrix disassembly                                               | 2.91E-02 | <i>CD44,CDH1</i>          |
| GO:1902807       | negative regulation of cell cycle G1/S phase transition                        | 2.91E-02 | <i>CDKN1B,SFN</i>         |

|             |                                                                         |          |                                |
|-------------|-------------------------------------------------------------------------|----------|--------------------------------|
| HP:0100570  | Carcinoid tumor                                                         | 2.93E-02 | <i>CDKN1B,APC</i>              |
| GO:0006631  | fatty acid metabolic process                                            | 2.95E-02 | <i>PTGS2,GSTP1,CAVI</i>        |
| TF:M06093_0 | Factor: ZNF17; motif: KGGTCCAASRTT; match class: 0                      | 3.10E-02 | <i>ESR2,S100A6</i>             |
| GO:0071241  | cellular response to inorganic substance                                | 3.11E-02 | <i>CDH1,CDKN1B</i>             |
| GO:0033135  | regulation of peptidyl-serine phosphorylation                           | 3.25E-02 | <i>CD44,CAVI</i>               |
| GO:0044773  | mitotic DNA damage checkpoint                                           | 3.25E-02 | <i>CDKN1B,SFN</i>              |
| REAC:453279 | Mitotic G1-G1/S phases                                                  | 3.25E-02 | <i>CDKN1B,CCND2,CDKN2A</i>     |
| GO:0001558  | regulation of cell growth                                               | 3.26E-02 | <i>CDKN1B,ESR2,CDKN2A</i>      |
| GO:0010469  | regulation of receptor activity                                         | 3.39E-02 | <i>CAVI,DAPK1</i>              |
| GO:0001935  | endothelial cell proliferation                                          | 3.39E-02 | <i>CAVI,CDH13</i>              |
| GO:0009896  | positive regulation of catabolic process                                | 3.46E-02 | <i>CAVI,CDKN1B,APC</i>         |
| HP:0010787  | Genital neoplasm                                                        | 3.46E-02 | <i>CDH1,CDKN1C,APC,AR</i>      |
| HP:0100568  | Neoplasm of the endocrine system                                        | 3.46E-02 | <i>CDKN1B,CDKN1C,APC,EDNRB</i> |
| REAC:111465 | Apoptotic cleavage of cellular proteins                                 | 3.49E-02 | <i>CDH1,APC</i>                |
| GO:0001726  | ruffle                                                                  | 3.60E-02 | <i>APC,S100A6</i>              |
| GO:0030031  | cell projection assembly                                                | 3.67E-02 | <i>CAVI,APC,CDH13</i>          |
| GO:0034332  | adherens junction organization                                          | 3.67E-02 | <i>CDH1,CDH13</i>              |
| GO:0071453  | cellular response to oxygen levels                                      | 3.67E-02 | <i>PTGS2,CAVI</i>              |
| GO:0051259  | protein oligomerization                                                 | 3.70E-02 | <i>CAVI,AR,GPX3</i>            |
| GO:0044774  | mitotic DNA integrity checkpoint                                        | 3.74E-02 | <i>CDKN1B,SFN</i>              |
| GO:0007200  | phospholipase C-activating G-protein coupled receptor signaling pathway | 3.74E-02 | <i>ESR1,EDNRB</i>              |
| GO:0033559  | unsaturated fatty acid metabolic process                                | 3.82E-02 | <i>PTGS2,GSTP1</i>             |
| GO:0046890  | regulation of lipid biosynthetic process                                | 3.82E-02 | <i>DKK3,PTGS2</i>              |
| GO:0071156  | regulation of cell cycle arrest                                         | 3.82E-02 | <i>CDKN1B,SFN</i>              |

|               |                                                                    |          |                            |
|---------------|--------------------------------------------------------------------|----------|----------------------------|
| HP:0006744    | Adrenocortical carcinoma                                           | 3.90E-02 | <i>CDKN1C,APC</i>          |
| GO:0009895    | negative regulation of catabolic process                           | 3.97E-02 | <i>TIMP3,FHIT</i>          |
| GO:0070486    | leukocyte aggregation                                              | 3.99E-02 | <i>CD44,CAVI,CDKN2A</i>    |
| GO:0050900    | leukocyte migration                                                | 4.02E-02 | <i>CD44,CAVI,EDNRB</i>     |
| GO:0008637    | apoptotic mitochondrial changes                                    | 4.04E-02 | <i>CDKN2A,SFN</i>          |
| GO:0030027    | lamellipodium                                                      | 4.35E-02 | <i>CDH1,APC</i>            |
| GO:0030335    | positive regulation of cell migration                              | 4.55E-02 | <i>PTGS2,APC,CDH13</i>     |
| GO:0061136    | regulation of proteasomal protein catabolic process                | 4.59E-02 | <i>CAVI,FHIT</i>           |
| TF:M06596_0   | Factor: ZNF486; motif: GKGCCAACGC; match class: 0                  | 4.63E-02 | <i>RASSF1,CAVI</i>         |
| GO:0005913    | cell-cell adherens junction                                        | 4.79E-02 | <i>CDH1,APC,SFN</i>        |
| TF:M06762_0   | Factor: ZNF222; motif: NGGTCRAAACGA; match class: 0                | 4.88E-02 | <i>APC,HIC1</i>            |
| GO:2001242    | regulation of intrinsic apoptotic signaling pathway                | 4.91E-02 | <i>CD44,CAVI</i>           |
| GO:2000147    | positive regulation of cell motility                               | 4.96E-02 | <i>PTGS2,APC,CDH13</i>     |
| GO:0010810    | regulation of cell-substrate adhesion                              | 5.00E-02 | <i>CDH13,CDKN2A</i>        |
| GO:0007264    | small GTPase mediated signal transduction                          | 5.00E-02 | <i>RASSF1,CDH13,CDKN2A</i> |
| GO:0048514    | blood vessel morphogenesis                                         | 5.00E-02 | <i>PTGS2,CAVI,CDH13</i>    |
| HPA:035030_13 | skin 1; keratinocytes[Supportive,High]                             | 5.00E-02 | <i>CD44,CDH1,CAVI,SFN</i>  |
| REAC:67913_12 | TP53 Regulates Transcription of Cell Cycle Genes                   | 5.00E-02 | <i>CDKN1B,SFN</i>          |
| HP:0002884    | Hepatoblastoma                                                     | 5.00E-02 | <i>CDKN1C,APC</i>          |
| TF:M01075_0   | Factor: PLZF; motif: KTNNTNGNNGNTAAAGYTTKATYWGTTTC; match class: 0 | 5.00E-02 | <i>ESR1,CDKN2A</i>         |
| KEGG:05224    | Breast cancer                                                      | 5.00E-02 | <i>ESR1,APC,ESR2</i>       |

**Table S3: Positions of CpG islands, their lengths, GC% frequency, A+T skew and G+ C skew**

| Name of the Gene | Number | Begin  | End    | Length (bp) | G+C frequency | CpGo/e ratio | start-p | AT skew | GC skew | Strand (Strand-p*) |
|------------------|--------|--------|--------|-------------|---------------|--------------|---------|---------|---------|--------------------|
| <i>CD44</i>      | 1/2    | 4867   | 6082   | 1216        | 0.6250        | 0.6317       | 0.2744  | 0.0175  | 0.0158  | plus (0.5119)      |
|                  | 2/2    | 42038  | 42990  | 953         | 0.5026        | 0.5839       | 0.1354  | -0.2025 | -0.0647 | plus (0.8005)      |
| <i>CDH13</i>     | 1/2    | 1186   | 2348   | 1062        | 0.5358        | 0.7138       | 0.2635  | -0.0426 | 0.0861  | plus (0.8396)      |
|                  | 2/2    | 3776   | 4473   | 598         | 0.4983        | 0.6213       | 0.1300  | -0.0667 | -0.0537 | plus (0.5103)      |
| <i>DAPK1</i>     | 1/5    | 4368   | 6649   | 2282        | 0.6275        | 0.7948       | 0.6125  | -0.0282 | 0.0936  | plus (0.8317)      |
|                  | 2/5    | 15354  | 16010  | 657         | 0.5145        | 0.5810       | 0.1197  | -0.1536 | -0.1006 | plus (0.5910)      |
|                  | 3/5    | 68245  | 68986  | 742         | 0.4623        | 0.5802       | 0.1034  | 0.0125  | 0.0029  | minus (0.5176)     |
|                  | 4/5    | 111991 | 112553 | 563         | 0.5044        | 0.5868       | 0.1127  | 0.0323  | 0.0282  | plus (0.5130)      |
|                  | 5/5    | 213095 | 213988 | 894         | 0.5917        | 0.5751       | 0.1720  | -0.1068 | 0.0057  | plus (0.7828)      |
| <i>RASSF1</i>    | 1/4    | 1      | 775    | 710         | 0.6437        | 0.6666       | 0.2634  | 0.0751  | 0.0197  | minus (0.6304)     |
|                  | 2/4    | 4662   | 5981   | 1320        | 0.6333        | 0.7253       | 0.3953  | -0.0041 | 0.0048  | plus (0.5345)      |
|                  | 3/4    | 7357   | 9377   | 2021        | 0.6299        | 0.7862       | 0.5673  | -0.0267 | 0.0621  | plus (0.7609)      |
|                  | 4/4    | 17226  | 18227  | 1002        | 0.6118        | 0.7304       | 0.3371  | 0.0334  | 0.0832  | plus               |

|               |     |       |       |      |        |        |        |         |         |                   |
|---------------|-----|-------|-------|------|--------|--------|--------|---------|---------|-------------------|
|               |     |       |       |      |        |        |        |         |         | (0.6854)          |
| <i>AR</i>     | 1/2 | 4747  | 5738  | 992  | 0.6452 | 0.5754 | 0.2149 | 0.0909  | -0.0813 | minus<br>(0.8875) |
|               | 2/2 | 6828  | 8070  | 1243 | 0.6275 | 0.6702 | 0.3186 | -0.0626 | -0.0077 | plus<br>(0.6491)  |
|               | 2/2 | 11108 | 12081 | 974  | 0.6068 | 0.9936 | 0.6361 | 0.0235  | -0.1100 | minus<br>(0.8467) |
| <i>CDKN2A</i> | 1/7 | 3194  | 5951  | 2758 | 0.6211 | 0.8151 | 0.6925 | 0.0392  | 0.1138  | plus<br>(0.7552)  |
|               | 2/7 | 9024  | 10208 | 1185 | 0.5156 | 0.5846 | 0.1597 | -0.0244 | -0.0311 | minus<br>(0.5302) |
|               | 3/7 | 22772 | 23591 | 820  | 0.5037 | 0.5974 | 0.1343 | -0.2334 | -0.0460 | plus<br>(0.8788)  |
|               | 4/7 | 23861 | 25353 | 1493 | 0.5700 | 0.7233 | 0.3570 | 0.0530  | 0.2056  | plus<br>(0.9011)  |
|               | 5/7 | 28024 | 29086 | 1063 | 0.5795 | 0.6163 | 0.2106 | 0.0067  | -0.0065 | minus<br>(0.5331) |
|               | 6/7 | 30508 | 31597 | 1090 | 0.5064 | 0.7890 | 0.3172 | 0.1078  | 0.0507  | minus<br>(0.6171) |
|               | 7/7 | 31843 | 32542 | 700  | 0.4800 | 0.6731 | 0.1591 | 0.0000  | -0.0714 | minus<br>(0.7174) |
| <i>GSTP1</i>  | 1/1 | 4243  | 6057  | 1815 | 0.6105 | 0.7338 | 0.4543 | 0.0976  | -0.0253 | minus<br>(0.8000) |



**Table S4: PEpID showing the positions of methylated cytosines, transcription start sites as well as chromosome number and method of sequencing**

| <b>Name of the Gene</b> | <b>Specimen</b>                       | <b>Methods</b>    | <b>Chromosome</b> | <b>Position of Methylated Cytosines</b>                                                                                                                                                                                                                                                                                                                                        | <b>Transcription Start Site</b> |
|-------------------------|---------------------------------------|-------------------|-------------------|--------------------------------------------------------------------------------------------------------------------------------------------------------------------------------------------------------------------------------------------------------------------------------------------------------------------------------------------------------------------------------|---------------------------------|
| <i>AR</i>               | NORMAL;<br>TUMOR                      | MSO<br>MICROARRAY | X                 | 66766506                                                                                                                                                                                                                                                                                                                                                                       | 66763873                        |
| <i>CD44</i>             | LNCaP                                 | METHYL RRBS       | 11                | 35160462; 35160567; 35160821; 35161274; 35165242;<br>35166165; 35178009; 35222210                                                                                                                                                                                                                                                                                              | 35160416                        |
| <i>CDH13</i>            | LNCaP; PrEC                           | METHYL RRBS       | 16                | 82660761; 82666919; 8267133; 82687412; 82746778;<br>82940932; 82943269; 82974840; 83022386; 83095051;<br>83126975; 83170755; 83341449; 83362860; 83386443;<br>83483585; 83497855; 83548520; 83566448; 83617792;<br>83619879; 83657635; 83659882; 83666921; 83679935;<br>83715823; 83723402; 83766892; 83770446; 83811075;<br>83824308; 83830706                                | 82660398                        |
| <i>CDKN2A</i>           | NORMAL;<br>PRIMARY<br>TUMOR           | MSO<br>MICROARRAY | 9                 | 21967890; 21968233; 21968329; 21968461; 21968681;<br>21968832; 21969748; 21971248; 21976436; 21990090;<br>21993500; 21994108                                                                                                                                                                                                                                                   | 21994490                        |
| <i>DAPK</i>             | LNCaP; PrEC                           | METHYL RRBS       | 9                 | 90112519; 90113695; 90114156; 90119028; 90132131;<br>90165959; 90166717; 90170784; 90182688; 90197021;<br>90219911; 90229671; 90225528; 90238633; 90272914;<br>90275049; 90279531; 90290324; 90292552; 90296441;<br>90299031; 90299466; 90321259; 90321475; 90322142                                                                                                           | 90112755                        |
| <i>GSTP1</i>            | NORMAL;<br>TUMOR;<br>PRIMARY<br>TUMOR | MSO<br>MICROARRAY | 11                | 67350499; 67350944; 67350955; 67350976; 67350989;<br>67350991; 67351018; 67351055; 67351089; 67351110;<br>67351141; 67351145; 67351177; 67351205; 67351209;<br>67351271; 67351340; 67351378; 67351392; 67351434;<br>67351456; 67351468; 67351490; 67351553; 67351571;<br>67351597; 67351608; 67351702; 67531720; 67351741;<br>67351757; 67351777; 67351786; 67351874; 67352041 | 67351065                        |
| <i>RASSF1</i>           | LNCaP                                 | METHYL RRBS       | 3                 | 50375349; 50375459; 50375496; 50376216; 50378169;                                                                                                                                                                                                                                                                                                                              | 50378367                        |

|  |  |  |  |                                                                                             |  |
|--|--|--|--|---------------------------------------------------------------------------------------------|--|
|  |  |  |  | 50378251; 50378283; 50378413; 50378425; 50378508;<br>50378591; 50378611; 50378717; 50378749 |  |
|--|--|--|--|---------------------------------------------------------------------------------------------|--|
